# Supplementary material for: Effects of Nitrogen Fertilizer on the Endosperm Composition and Eating Quality of Rice Varieties with Different Protein Components
Source: MDPI journal article supplement (doi:10.3390/agronomy14030469), 2024-02-27
Supplement: s1 [file s1]

## Supplementary Materials

Supplementary Table S1 ANOVA of the effect of nitrogen fertilizer regulation on starch characteristics

| Source               | AAC     |            | Fa      |            | Fb <sub>3</sub> |          | Fb <sub>1</sub> +Fb <sub>2</sub> |       |
|----------------------|---------|------------|---------|------------|-----------------|----------|----------------------------------|-------|
|                      | MS      | F          | MS      | F          | MS              | F        | MS                               | F     |
| Varieties            | 338.753 | 2317.629** | 127.873 | 1536.813** | 6.590           | 276.07** | 24.234                           | 2.180 |
| Fertilizer           | 0.550   | 3.761*     | 0.201   | 2.414      | 0.046           | 1.915    | 8.938                            | 0.804 |
| Varieties×Fertilizer | 0.616   | 4.212**    | 0.107   | 1.290      | 0.044           | 1.845    | 8.829                            | 0.794 |
| Error                | 0.146   |            | 0.083   |            | 0.024           |          | 11.115                           |       |

Note: \*\*, \* indicates the correlation at P < 0.05 and P < 0.01 levels. Same as follow

Supplementary Table S2 ANOVA of the effect of nitrogen fertilizer regulation on protein components

| Source               | Albumin |          | Globulin |          | Prolamine |          | Glutelin |          |
|----------------------|---------|----------|----------|----------|-----------|----------|----------|----------|
|                      | MS      | F        | MS       | F        | MS        | F        | MS       | F        |
| Varieties            | 8.149   | 23.207** | 9.461    | 15.308** | 6.074     | 42.975** | 1115.925 | 60.887** |
| Fertilizer           | 0.075   | 0.215    | 0.213    | 0.344    | 0.532     | 3.761*   | 147.786  | 8.063**  |
| Varieties×Fertilizer | 0.524   | 1.491    | 1.795    | 2.905*   | 0.670     | 4.739**  | 51.437   | 2.807*   |
| Error                | 0.351   |          | 0.618    |          | 0.141     |          | 18.328   |          |

Note: \*\*, \* indicates the correlation at P < 0.05 and P < 0.01 levels. Same as follow

Supplementary Table S3 ANOVA of the effect of nitrogen fertilizer regulation on RVA characteristic

| Source               | Peak Viscosity |           | Trough Viscosity |            | Breakdown |          | Final Viscosity |            | Setback  |            |
|----------------------|----------------|-----------|------------------|------------|-----------|----------|-----------------|------------|----------|------------|
|                      | MS             | F         | MS               | F          | MS        | F        | MS              | F          | MS       | F          |
| Varieties            | 1.41E+06       | 181.591** | 1.94E+06         | 1310.261** | 6.06E+04  | 16.227** | 7.14E+06        | 1878.017** | 1.66E+06 | 2053.978** |
| Fertilizer           | 2.42E+04       | 3.115     | 1.02E+04         | 6.842**    | 9.84E+03  | 2.634    | 1.61E+04        | 4.225*     | 6.80E+02 | 0.843      |
| Varieties×Fertilizer | 2.99E+03       | 0.384     | 2.35E+03         | 1.583      | 2.81E+03  | 0.752    | 3.12E+03        | 0.820      | 1.25E+02 | 0.155      |
| Error                | 7.77E+03       |           | 1.48E+03         |            | 3.74E+03  |          | 3.80E+03        |            | 8.07E+02 |            |

Note: \*\*, \* indicates the correlation at P < 0.05 and P < 0.01 levels. Same as follow

Supplementary Table S4 ANOVA of the effect of nitrogen fertilizer regulation on taste traits

| Source               | Taste Value |           | Appearance |           | Hardness |           | Viscosity |           | Balance  |           |
|----------------------|-------------|-----------|------------|-----------|----------|-----------|-----------|-----------|----------|-----------|
|                      | MS          | F         | MS         | F         | MS       | F         | MS        | F         | MS       | F         |
| Varieties            | 1324.559    | 116.525** | 4001.265   | 110.321** | 417.143  | 111.953** | 3933.994  | 114.273** | 4469.438 | 120.896** |
| Fertilizer           | 187.983     | 16.537**  | 608.987    | 16.791**  | 57.964   | 15.556**  | 592.242   | 17.203**  | 649.464  | 17.568**  |
| Varieties×Fertilizer | 24.884      | 2.189     | 82.754     | 2.282     | 11.814   | 3.171*    | 50.769    | 1.475     | 85.924   | 2.324     |
| Error                | 11.367      |           | 36.269     |           | 3.726    |           | 34.426    |           | 36.969   |           |

Note: \*\*, \* indicates the correlation at P < 0.05 and P < 0.01 levels. Same as follow
